# Supplementary material for: ERp19 contributes to tumorigenicity in human gastric cancer by promoting cell growth, migration and invasion
Source: PubMed Central journal article supplement (PMC4494905; doi:10.18632/oncotarget.3649), 2015-03-26
Supplement: oncotarget-06-11794-s001.pdf [file oncotarget-06-11794-s001.pdf]

# ERp19 contributes to tumorigenicity in human gastric cancer by promoting cell growth, migration and invasion

Supplementary Material

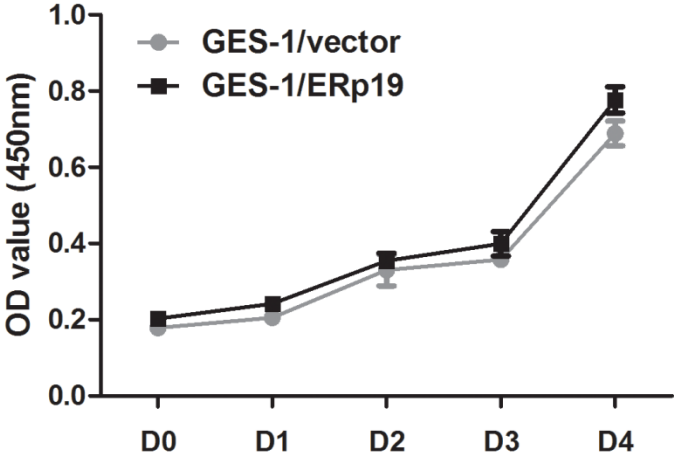

Fig.S1: Effects of ERp19 on the ability of cell growth in GES-1.

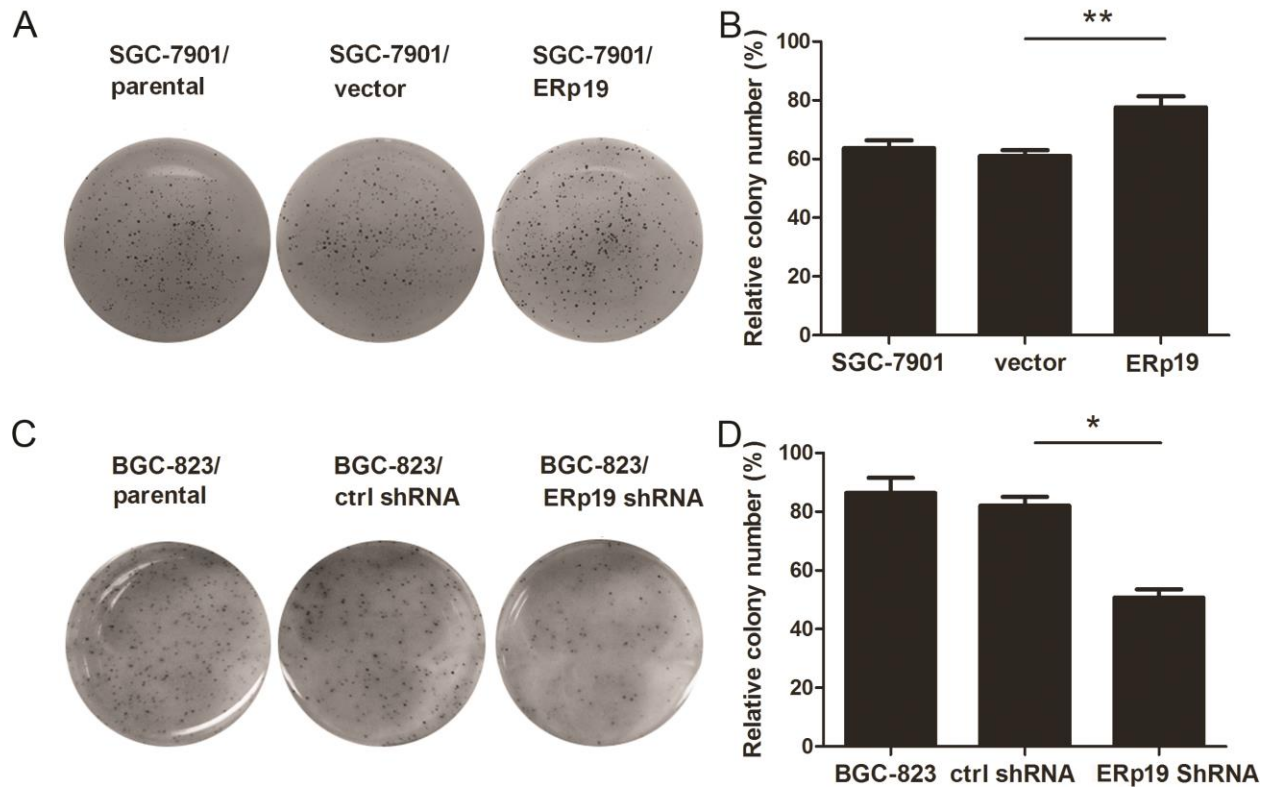

**Fig.S2: Effects of ERp19 on cell growth in human gastric cancer cells using the soft agar colony formation assay.**

A and B Effects of ERp19 overexpression on SGC-7901 cell growth using the soft agar colony formation assay. The same amounts of SGC-7901/parental, SGC-7901/vector and SGC-7901/ERp19 cells were plated into a 6-well plate. Cell colonies were stained and counted on the 14th day (\*\* $P < 0.01$ ). C and D, Effects of ERp19 knockdown on BGC-823 growth using the soft agar colony formation assay. The data represents mean  $\pm$  SD of three independent experiments (\* $P < 0.05$ ).

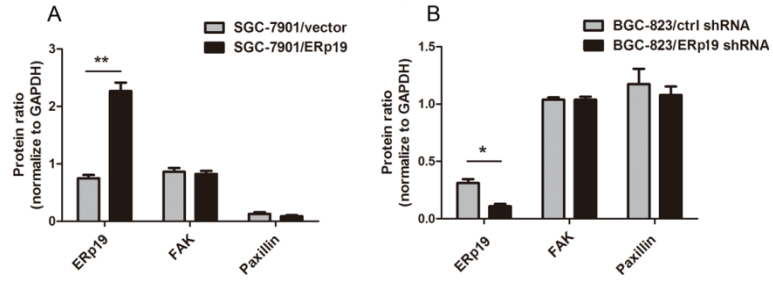

**Fig.S3: Protein ratio of ERp19, FAK and paxillin normalized to GAPDH.** A, Protein ratio of ERp19, FAK and paxillin in SGC-7901 cells (\*\* $P < 0.01$ ). B, Protein ratio of ERp19, FAK and paxillin in BGC-823 cells (\* $P < 0.05$ ).
